# Supplementary material
Source: publisher site journal article supplement (https://www.dovepress.com/article/93303)
Supplement: Supplementary file 1 [file get_supplementary_file.php]

**SUPPLEMENTAL MATERIAL**

**Early Response to Inhaled Bronchodilators and Corticosteroids as a Predictor of 12-Month Response and COPD Exacerbations**

*Peter M. Calverley, MD, PhD;<sup>1</sup> Dirkje S. Postma, MD, PhD;<sup>2</sup> Antonio R. Anzueto, MD;<sup>3</sup> Barry J. Make, MD;<sup>4</sup> Göran Eriksson, PhD;<sup>5</sup> Stefan Peterson, PhD;<sup>6</sup> and Christine R. Jenkins, MD, PhD<sup>7</sup>*

## **SUPPLEMENTARY RESULTS**

### **Missing Data**

In the 0–2-month analysis, 13.1% and 15.6% of patients had missing data for forced expiratory volume in 1 second (FEV<sub>1</sub>) and St George’s Respiratory Questionnaire (SGRQ) total score, respectively, which were split similarly between drop-out and missing measurements. For both FEV<sub>1</sub> and SGRQ total score, the placebo group had the greatest frequency of missing data and the budesonide/formoterol combination therapy group had the lowest frequency of missing data. At 12 months, 17.1% and 20.1% of patients had missing data for FEV<sub>1</sub> and SGRQ total score, respectively. Drop-out was the most common reason for missing data.

## SUPPLEMENTARY TABLES

**Table S1.** Baseline and clinical demographics according to 2-month FEV<sub>1</sub> responder status<sup>a</sup> among all patients who received budesonide/formoterol, formoterol, or placebo, and by treatment type, in the two placebo-controlled trials included in the 0–2-month analysis<sup>1,2</sup>

| Characteristics                                | Budesonide/Formoterol<br>(n = 743) |                                |                     | Formoterol<br>(n = 743) |                                |                     | Placebo<br>(n = 751)   |                                |                      |
|------------------------------------------------|------------------------------------|--------------------------------|---------------------|-------------------------|--------------------------------|---------------------|------------------------|--------------------------------|----------------------|
|                                                | Responder<br>(n = 300)             | Non-<br>responder<br>(n = 376) | Missing<br>(n = 67) | Responder<br>(n = 219)  | Non-<br>responder<br>(n = 427) | Missing<br>(n = 97) | Responder<br>(n = 164) | Non-<br>responder<br>(n = 455) | Missing<br>(n = 132) |
| Age, years                                     | 62.0 (9.3)                         | 63.6 (8.6)                     | 65.0 (8.4)          | 61.0 (9.1)              | 63.6 (9.2)                     | 65.3 (8.9)          | 60.7 (9.9)             | 63.2 (9.0)                     | 65.0 (9.2)           |
| Male, n (%)                                    | 187 (62.3)                         | 256 (68.1)                     | 38 (56.7)           | 160 (73.1)              | 271 (63.5)                     | 57 (58.8)           | 116 (70.7)             | 295 (64.8)                     | 92 (67.7)            |
| BMI, kg/m <sup>2</sup>                         | 26.7 (5.6)                         | 26.5 (5.6)                     | 27.6 (6.6)          | 27.5 (5.7)              | 26.5 (5.5)                     | 27.3 (6.3)          | 27.5 (6.2)             | 26.6 (5.8)                     | 27.8 (6.0)           |
| Time since first symptoms,<br>months           | 125.9<br>(85.5)                    | 126.8<br>(85.2)                | 126.1<br>(78.2)     | 127.7<br>(92.1)         | 128.9<br>(79.6)                | 127.6<br>(94.3)     | 126.7<br>(84.7)        | 127.8<br>(85.8)                | 127.7<br>(87.6)      |
| FEV <sub>1</sub>                               |                                    |                                |                     |                         |                                |                     |                        |                                |                      |
| Pre-bronchodilator, %<br>predicted             | 35.2 (9.1)                         | 32.2 (9.7)                     | 31.1<br>(10.7)      | 35.3 (9.0)              | 33.3 (9.8)                     | 33.6<br>(11.6)      | 35.5 (8.7)             | 35.2 (9.3)                     | 33.8 (10.4)          |
| Pre-bronchodilator, <sup>b</sup> L             | 1.0 (0.4)                          | 1.0 (0.4)                      | 1.0 (0.5)           | 1.1 (0.4)               | 1.0 (0.4)                      | 1.0 (0.4)           | 1.1 (0.4)              | 1.1 (0.4)                      | 1.0 (0.4)            |
| Reversibility, % predicted                     | 6.7 (5.8)                          | 4.5 (4.7)                      | 5.8 (5.1)           | 5.7 (5.4)               | 5.2 (6.0)                      | 4.9 (5.7)           | 6.6 (8.3)              | 5.6 (5.9)                      | 5.9 (5.9)            |
| Post-bronchodilator, %<br>predicted            | 41.8 (11.3)                        | 36.8 (11.2)                    | 36.9<br>(12.3)      | 41.0 (11.3)             | 38.5 (12.2)                    | 38.3<br>(14.1)      | 42.2 (12.5)            | 40.9 (11.4)                    | 39.5 (12.0)          |
| Pre-bronchodilator<br>FEV <sub>1</sub> /FVC, % | 48.6 (10.4)                        | 46.0 (10.0)                    | 47.1<br>(12.7)      | 48.8 (10.2)             | 47.0 (10.5)                    | 46.4<br>(11.3)      | 50.2 (9.1)             | 48.0 (10.5)                    | 46.1 (10.8)          |
| Smoking history                                |                                    |                                |                     |                         |                                |                     |                        |                                |                      |
| Median, pack-years                             | 40.0                               | 40.0                           | 45.0                | 40.0                    | 40.0                           | 45.0                | 38.0                   | 40.0                           | 43.5                 |

|                                                          |                 |                   |                  |                  |                  |                  |                  |                 |                  |
|----------------------------------------------------------|-----------------|-------------------|------------------|------------------|------------------|------------------|------------------|-----------------|------------------|
| Former smokers, n (%)                                    | 171 (57.0)      | 227 (60.4)        | 42 (62.7)        | 112 (51.1)       | 233 (54.6)       | 67 (69.1)        | 80 (48.8)        | 257 (56.5)      | 94 (71.2)        |
| Current smokers, n (%)                                   | 129 (43.0)      | 149 (39.6)        | 25 (37.3)        | 107 (48.9)       | 194 (45.4)       | 30 (30.9)        | 84 (51.2)        | 198 (43.5)      | 38 (28.8)        |
| SGRQ total score, <sup>b</sup> points (range)            | 53.6 (6.7–93.6) | 56.8 (14.0–100.0) | 53.3 (11.9–86.1) | 54.1 (16.4–93.3) | 54.5 (19.8–97.4) | 56.9 (20.6–96.5) | 56.1 (11.7–93.3) | 54.9 (8.8–96.9) | 52.4 (13.6–88.8) |
| Reliever use, No. of inhalations (range)                 | 3.5 (0.0–21.6)  | 3.7 (0.0–21.5)    | 3.8 (0.0–19.7)   | 3.9 (0.0–27.2)   | 3.7 (0.0–18.9)   | 4.9 (0.0–32.5)   | 3.7 (0.0–12.8)   | 3.3 (0.0–28.0)  | 3.9 (0.0–22.4)   |
| No. of COPD maintenance medications <sup>c</sup> , n (%) |                 |                   |                  |                  |                  |                  |                  |                 |                  |
| 0                                                        | 86 (28.7)       | 81 (21.5)         | 12 (17.9)        | 61 (27.9)        | 106 (24.8)       | 23 (23.7)        | 52 (31.7)        | 123 (27.0)      | 24 (18.2)        |
| 1                                                        | 73 (24.3)       | 79 (21.0)         | 17 (25.4)        | 58 (26.5)        | 103 (24.1)       | 17 (17.5)        | 38 (23.2)        | 107 (23.5)      | 19 (14.4)        |
| 2                                                        | 85 (28.3)       | 123 (32.7)        | 28 (41.8)        | 60 (27.4)        | 116 (27.2)       | 35 (36.1)        | 43 (26.2)        | 122 (26.8)      | 51 (38.6)        |
| 3                                                        | 56 (18.7)       | 93 (24.7)         | 10 (14.9)        | 40 (18.3)        | 102 (23.9)       | 22 (22.7)        | 31 (18.9)        | 103 (22.6)      | 38 (28.8)        |

Data are given as mean (SD), unless otherwise stated. BMI = body mass index; COPD = chronic obstructive pulmonary disease; FEV<sub>1</sub> = forced expiratory volume in 1 second; FVC = forced vital capacity; ICS = inhaled corticosteroid; LA = long-acting bronchodilator; SD = standard deviation; SGRQ = St George's Respiratory Questionnaire.

<sup>a</sup> FEV<sub>1</sub> response was defined as an improvement in FEV<sub>1</sub> of ≥100 mL.

<sup>b</sup> Measured at randomization.

<sup>c</sup> The number of COPD maintenance medications is defined as follows: 0 = no maintenance treatment with LA or ICS (short-acting bronchodilators only); 1 = one LA or ICS; 2 = two LA or ICS; 3 = three LA or ICS.

**Table S2.** Baseline and clinical demographics according to 2-month SGRQ responder status<sup>a</sup> among all patients who received budesonide/formoterol, formoterol, or placebo, and by treatment type, in the two placebo-controlled trials included in the 0–2-month analysis<sup>1,2</sup>

| Characteristics                             | Budesonide/Formoterol<br>(n = 743) |                                |                     | Formoterol<br>(n = 743) |                                |                      | Placebo<br>(n = 751)   |                                |                      |
|---------------------------------------------|------------------------------------|--------------------------------|---------------------|-------------------------|--------------------------------|----------------------|------------------------|--------------------------------|----------------------|
|                                             | Responder<br>(n = 324)             | Non-<br>responder<br>(n = 331) | Missing<br>(n = 88) | Responder<br>(n = 263)  | Non-<br>responder<br>(n = 366) | Missing<br>(n = 114) | Responder<br>(n = 243) | Non-<br>responder<br>(n = 352) | Missing<br>(n = 156) |
| Age, years                                  | 62.7 (9.2)                         | 63.0 (8.7)                     | 65.1 (8.7)          | 61.7 (9.1)              | 63.5 (9.2)                     | 64.8 (9.2)           | 62.0 (9.7)             | 62.7 (9.0)                     | 64.8 (9.2)           |
| Male, n (%)                                 | 208 (64.2)                         | 221 (66.8)                     | 52 (59.1)           | 172 (65.4)              | 248 (67.8)                     | 68 (59.6)            | 159 (65.4)             | 236 (67.1)                     | 108 (69.2)           |
| BMI, kg/m <sup>2</sup>                      | 26.4 (5.4)                         | 26.7 (5.8)                     | 27.1 (6.2)          | 26.4 (5.2)              | 27.0 (5.9)                     | 27.3 (6.2)           | 26.9 (5.6)             | 26.8 (6.1)                     | 27.7 (6.1)           |
| Time since first symptoms, months           | 124.3<br>(84.6)                    | 128.4<br>(86.6)                | 126.1<br>(77.6)     | 130.9<br>(87.6)         | 127.6<br>(81.9)                | 125.0<br>(91.2)      | 132.8<br>(94.9)        | 125.0<br>(79.1)                | 125.2<br>(85.5)      |
| FEV <sub>1</sub>                            |                                    |                                |                     |                         |                                |                      |                        |                                |                      |
| Pre-bronchodilator, % predicted             | 33.7 (9.9)                         | 33.4 (9.2)                     | 31.7 (10.4)         | 35.3 (9.4)              | 33.1 (9.6)                     | 33.8 (11.4)          | 35.8 (9.4)             | 35.0 (9.1)                     | 33.8 (10.0)          |
| Pre-bronchodilator, <sup>b</sup> L          | 1.0 (0.4)                          | 1.0 (0.4)                      | 1.0 (0.5)           | 1.1 (0.4)               | 1.0 (0.4)                      | 1.0 (0.4)            | 1.1 (0.4)              | 1.1 (0.4)                      | 1.0 (0.4)            |
| Reversibility, % predicted                  | 6.0 (5.7)                          | 5.1 (5.0)                      | 5.3 (4.9)           | 5.4 (5.9)               | 5.4 (5.7)                      | 5.0 (5.6)            | 6.0 (6.9)              | 5.9 (6.5)                      | 5.9 (5.8)            |
| Post-bronchodilator, % predicted            | 39.6 (11.9)                        | 38.5<br>(11.2)                 | 37.0<br>(11.713)    | 40.6 (11.9)             | 38.5<br>(12.0)                 | 38.6 (13.7)          | 41.8 (12.1)            | 40.9 (11.6)                    | 39.6 (11.6)          |
| Pre-bronchodilator FEV <sub>1</sub> /FVC, % | 47.5 (10.8)                        | 46.7 (9.5)                     | 47.3 (12.3)         | 48.4 (10.6)             | 47.1<br>(10.2)                 | 46.4 (11.5)          | 49.3 (10.0)            | 48.1 (10.3)                    | 46.4 (10.6)          |
| Smoking history                             |                                    |                                |                     |                         |                                |                      |                        |                                |                      |
| Median, pack-years                          | 40.0                               | 40.0                           | 45.0                | 40.0                    | 40.0                           | 45.0                 | 40.0                   | 40.0                           | 40.0                 |
| Former smokers, n (%)                       | 195 (60.2)                         | 191 (57.7)                     | 54 (61.4)           | 133 (50.6)              | 202 (55.2)                     | 77 (67.5)            | 128 (52.7)             | 196 (55.7)                     | 107 (68.6)           |

|                                                          |                   |                 |                  |                  |                  |                  |                  |                 |                  |
|----------------------------------------------------------|-------------------|-----------------|------------------|------------------|------------------|------------------|------------------|-----------------|------------------|
| Current smokers, n (%)                                   | 129 (39.8)        | 140 (42.3)      | 34 (38.6)        | 130 (49.4)       | 164 (44.8)       | 37 (32.5)        | 115 (47.3)       | 156 (44.3)      | 49 (31.4)        |
| SGRQ total score, <sup>b</sup> points (range)            | 58.3 (19.5–100.0) | 52.5 (6.7–93.9) | 53.7 (11.9–92.7) | 56.2 (16.4–97.4) | 52.7 (17.2–93.3) | 57.4 (20.6–96.5) | 59.3 (16.9–96.9) | 52.2 (8.8–93.3) | 53.4 (13.6–88.8) |
| Reliever use, No. of inhalations (range)                 | 3.8 (0.0–21.6)    | 3.6 (0.0–21.5)  | 3.4 (0.0–19.7)   | 3.8 (0.0–27.2)   | 3.7 (0.0–20.0)   | 4.6 (0.0–32.5)   | 3.6 (0.0–16.2)   | 3.3 (0.0–28.0)  | 3.9 (0.0–22.4)   |
| No. of COPD maintenance medications <sup>c</sup> , n (%) |                   |                 |                  |                  |                  |                  |                  |                 |                  |
| 0                                                        | 86 (26.5)         | 74 (22.4)       | 19 (21.6)        | 78 (29.7)        | 85 (23.2)        | 27 (23.7)        | 78 (32.1)        | 90 (25.6)       | 20 (12.8)        |
| 1                                                        | 82 (25.3)         | 66 (19.9)       | 21 (23.9)        | 73 (27.8)        | 86 (23.5)        | 19 (16.7)        | 65 (26.8)        | 75 (21.3)       | 15 (9.6)         |
| 2                                                        | 94 (29.0)         | 108 (32.6)      | 34 (38.6)        | 67 (25.5)        | 104 (28.4)       | 40 (35.1)        | 63 (25.9)        | 94 (26.7)       | 38 (24.4)        |
| 3                                                        | 62 (19.1)         | 83 (25.1)       | 14 (15.9)        | 45 (17.1)        | 91 (24.9)        | 28 (24.6)        | 37 (15.2)        | 93 (26.4)       | 27 (17.3)        |

Data are given as mean (SD), unless otherwise stated. BMI = body mass index; COPD = chronic obstructive pulmonary disease; FEV<sub>1</sub> =

forced expiratory volume in 1 second; FVC = forced vital capacity; ICS, inhaled corticosteroid; LA = long-acting bronchodilator; SD =

standard deviation; SGRQ = St George's Respiratory Questionnaire.

<sup>a</sup> SGRQ response was defined as a reduction (ie, an improvement) in the SGRQ total score of  $\geq 4$  points.

<sup>b</sup> Measured at randomization.

<sup>c</sup> The number of COPD maintenance medications is defined as follows: 0 = no maintenance treatment with LA or ICS (short-acting bronchodilators only); 1 = one LA or ICS; 2 = two LA or ICS; 3 = three LA or ICS.

## SUPPLEMENTARY FIGURE LEGENDS

**Figure S1.** Proportion of patients who received treatment with budesonide/formoterol or formoterol who were classified as responders or non-responders, or who had missing data for FEV<sub>1</sub>, at **(A)** 2 months<sup>1,2</sup> and **(B)** 12 months.<sup>2,3</sup> Responders are defined as patients with an improvement in FEV<sub>1</sub> of  $\geq 100$  mL from baseline. \*Missing FEV<sub>1</sub>. BUD = budesonide; FEV<sub>1</sub> = forced expiratory volume in 1 second; FORM = formoterol.

(A)

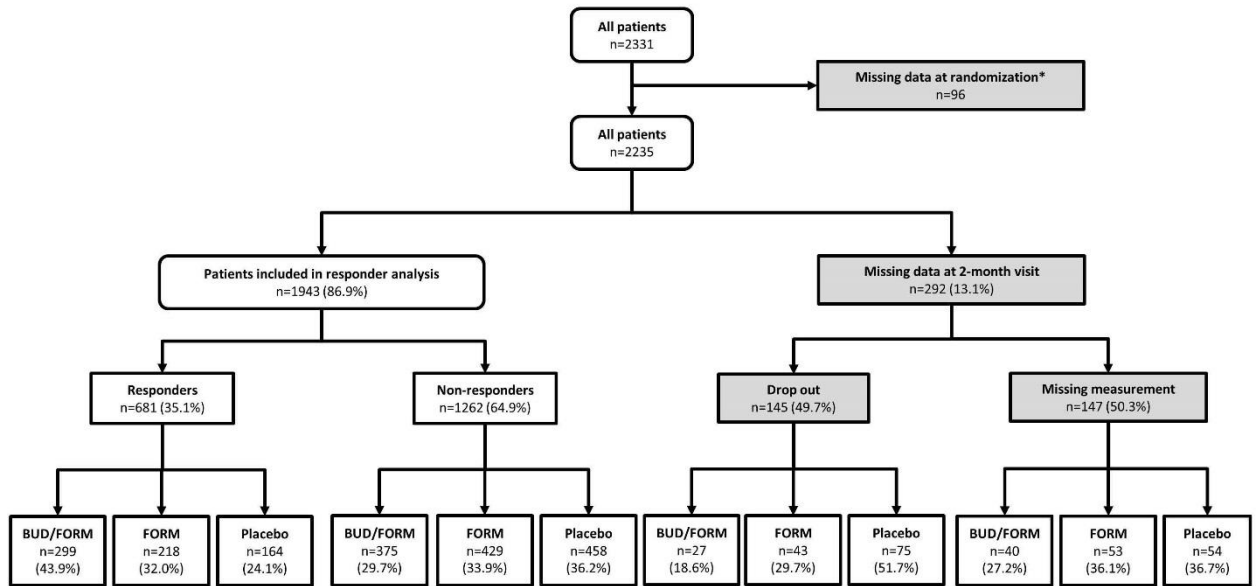

(B)

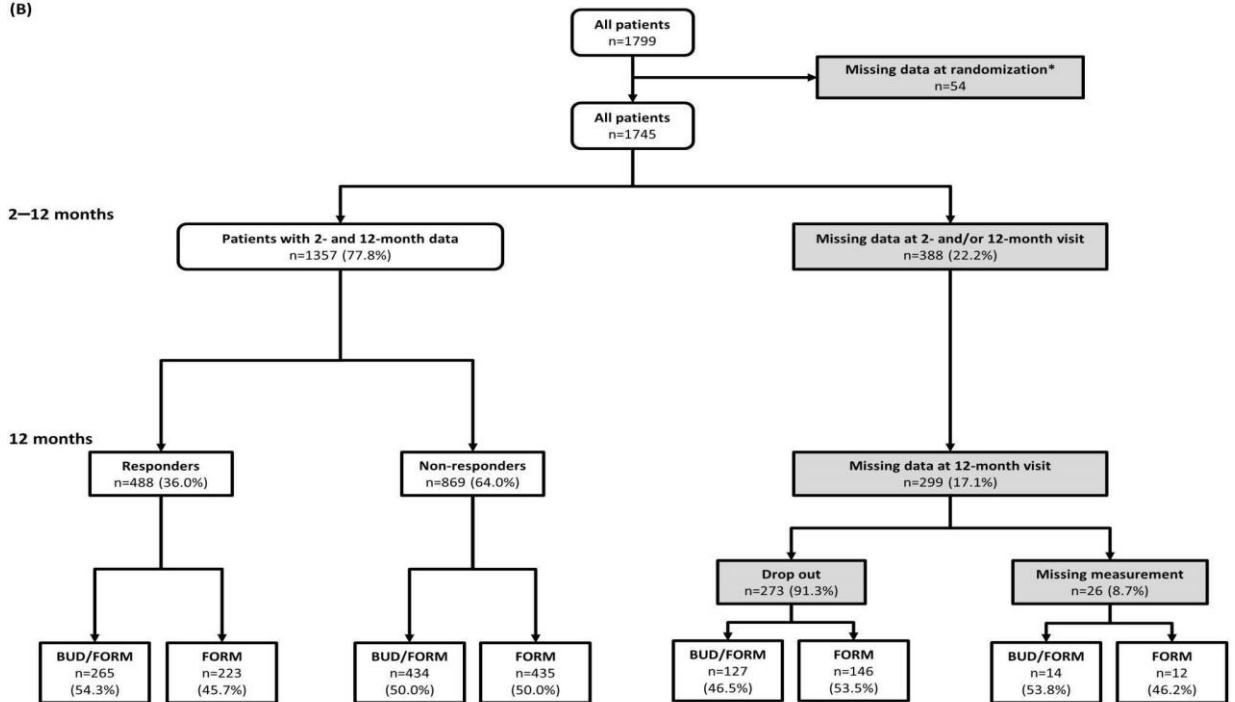



**Figure S2.** Proportion of patients who received treatment with budesonide/formoterol or formoterol who were classified as responders or non-responders, or who had missing data for SGRQ total score, at **(A)** 2 months<sup>1,2</sup> and **(B)** 12 months.<sup>2,3</sup> Responders are defined as patients with an improvement in the SGRQ total score of  $\geq 4$  points from baseline. \*Missing SGRQ total score. BUD = budesonide; FORM = formoterol; SGRQ = St George's Respiratory Questionnaire.

(A)

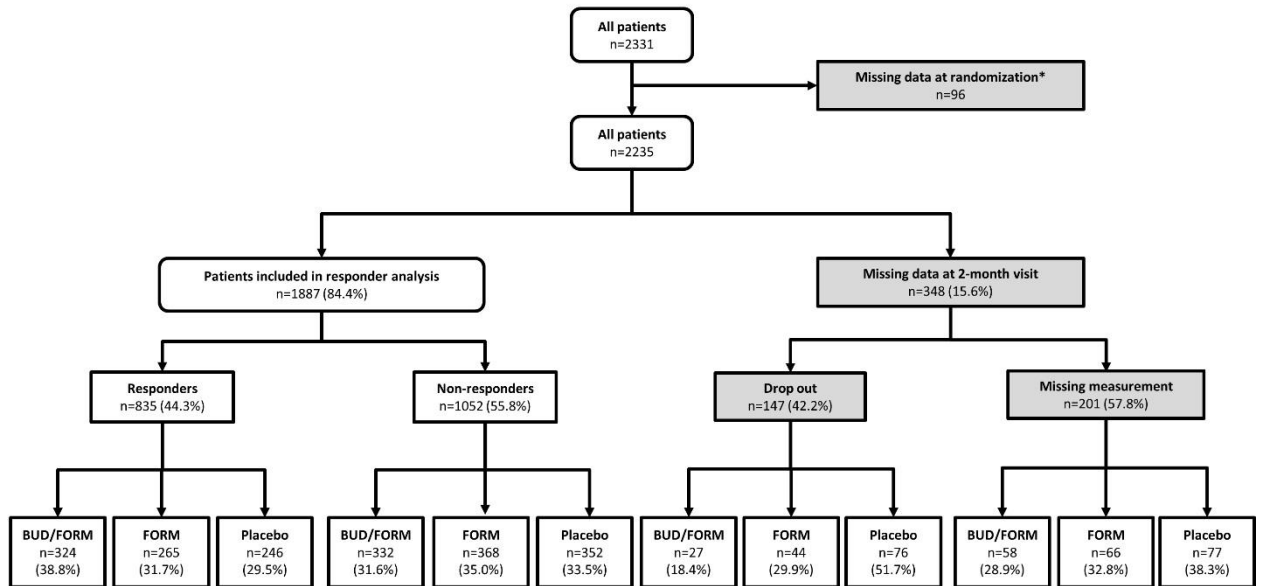

(B)

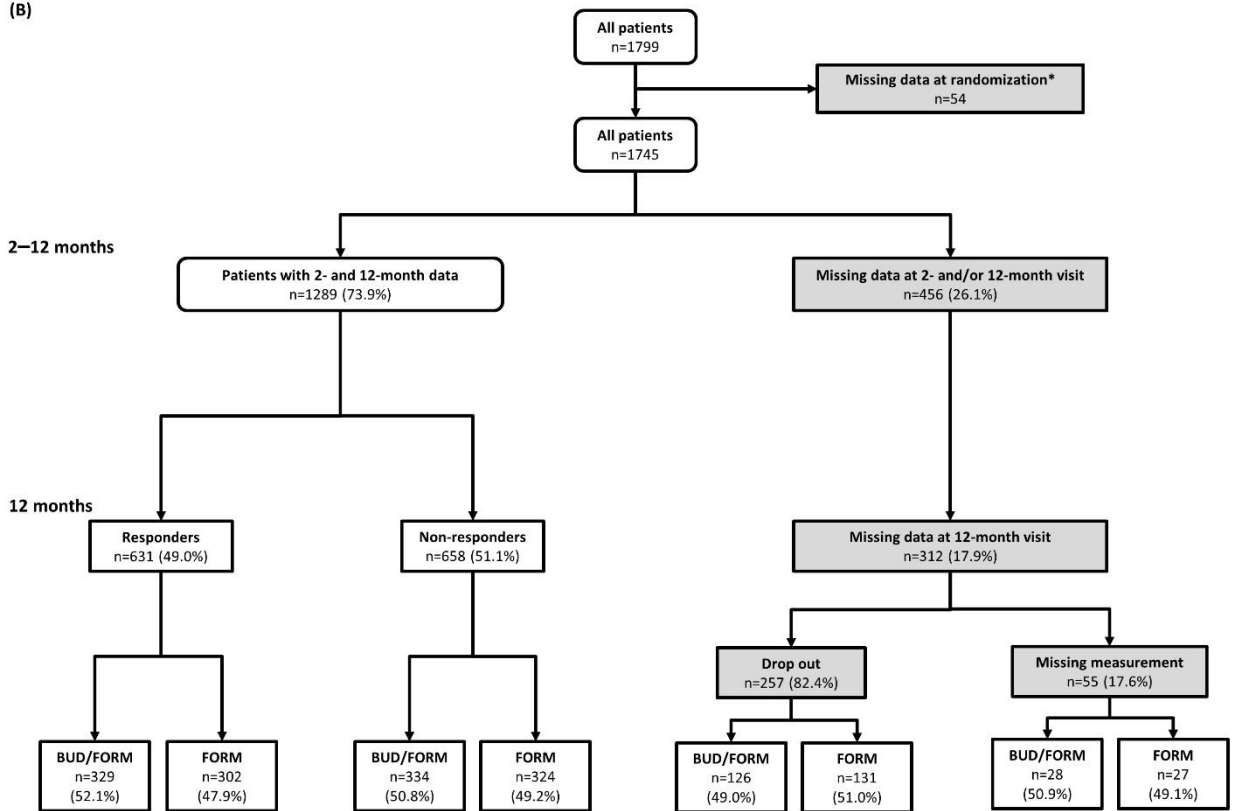

## SUPPLEMENTARY REFERENCES

- 1.** Tashkin DP, Rennard SI, Martin P, et al. Efficacy and safety of budesonide and formoterol in one pressurized metered-dose inhaler in patients with moderate to very severe chronic obstructive pulmonary disease: results of a 6-month randomized clinical trial. *Drugs*. 2008;68(14):1975–2000.
- 2.** Rennard SI, Tashkin DP, McElhattan J, et al. Efficacy and tolerability of budesonide/formoterol in one hydrofluoroalkane pressurized metered-dose inhaler in patients with chronic obstructive pulmonary disease: results from a 1-year randomized controlled clinical trial. *Drugs*. 2009;69(5):549–565.
- 3.** Sharafkhaneh A, Southard JG, Goldman M, Uryniak T, Martin UJ. Effect of budesonide/formoterol pMDI on COPD exacerbations: a double-blind, randomized study. *Respir Med*. 2012;106(2):257–268.
